# Supplementary material for: Systems Biology Analysis Merging Phenotype, Metabolomic and Genomic Data Identifies Non-SMC Condensin I Complex, Subunit G (NCAPG) and Cellular Maintenance Processes as Major Contributors to Genetic Variability in Bovine Feed Efficiency
Source: PubMed Central journal article supplement (PMC4398489; doi:10.1371/journal.pone.0124574), 2015-04-15

**Additional\_file\_1:** Manhattan plots of GWAS results. Shown is the significance of association  $[-\log_{10}(p)]$  between SNPs across the bovine genome and the target traits from the two groups feed efficiency (A-C) and metabolites (D-N). The red line marks the significance level of  $p=0.05$  before correction for multiple testing. SNPs above this line theoretically had the chance to be represented via a gene in the AWM.

**(A)** residual feed intake (RFI), **(B)** feed conversion rate (FCR), **(C)** daily energy intake (dEI), **(D)** arginine, **(E)** lysine, **(F)** free carnitine (C0), **(G)** acetylcarnitine (C2), **(H)** valerylcarnitine (C5), **(I)** suberylcarnitine (C8:1), **(J)** myristylcarnitine (C14), **(K)** stearoylcarnitine (C18); **(L)** diacylphosphatidylcholine C32:0 (PC\_aa\_C32:0), **(M)** acylethylphoshatidylcholine C36:1 (PC\_ae\_C36:1), **(N)** sphingomyelin C20:2 (SM\_C20:2).

**(A) Residual feed intake (RFI)**

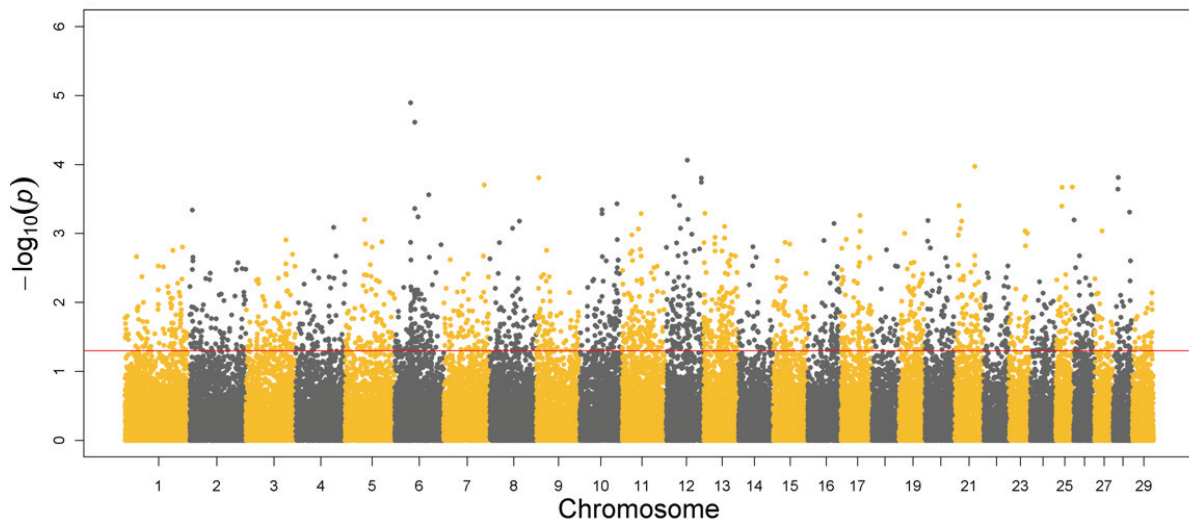

**(B) Feed conversion rate (FCR)**

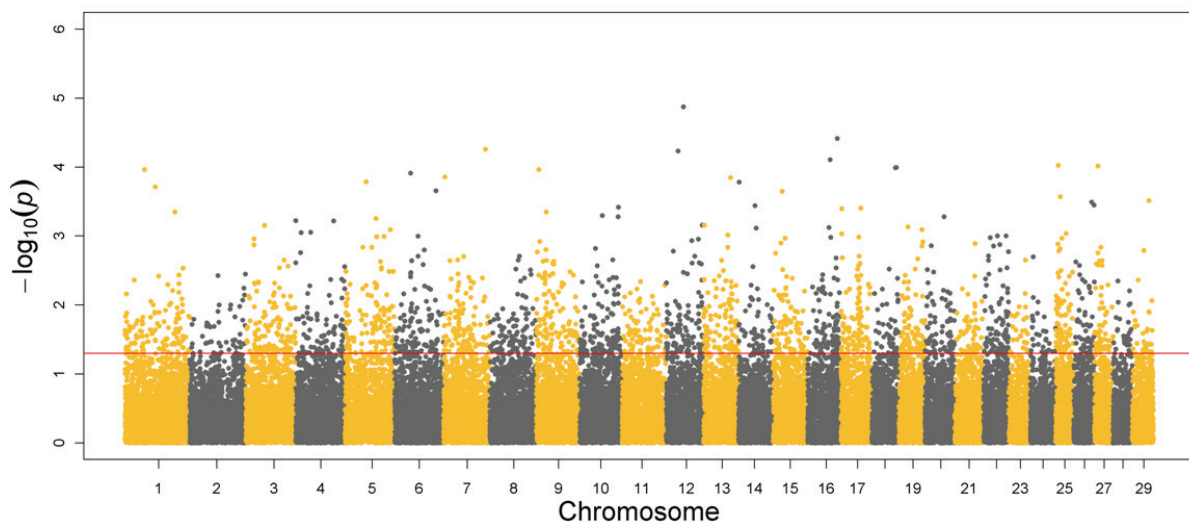

**(C) Daily energy intake (dEI)**

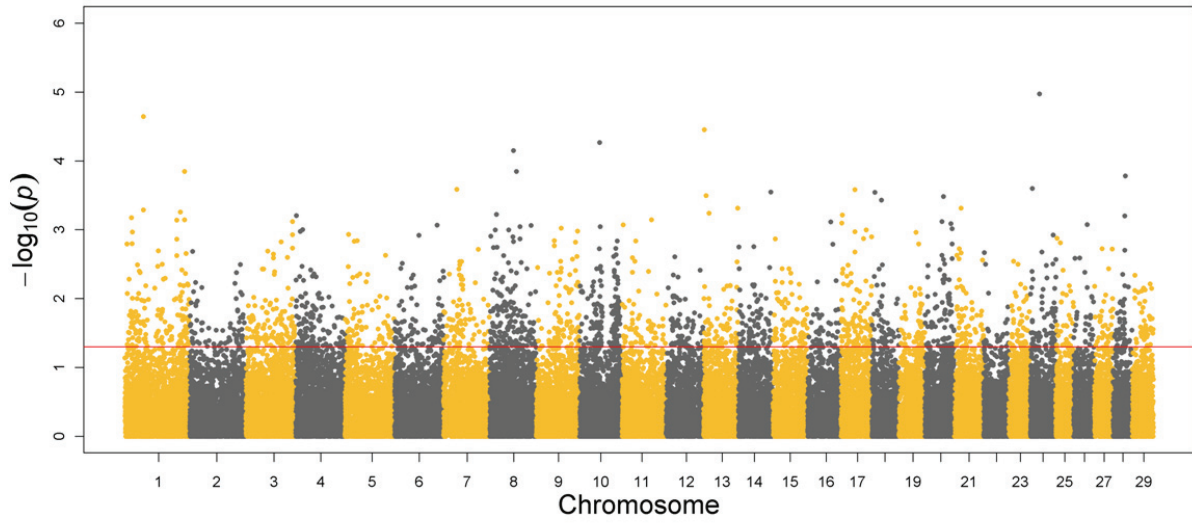

**(D) Arginine**

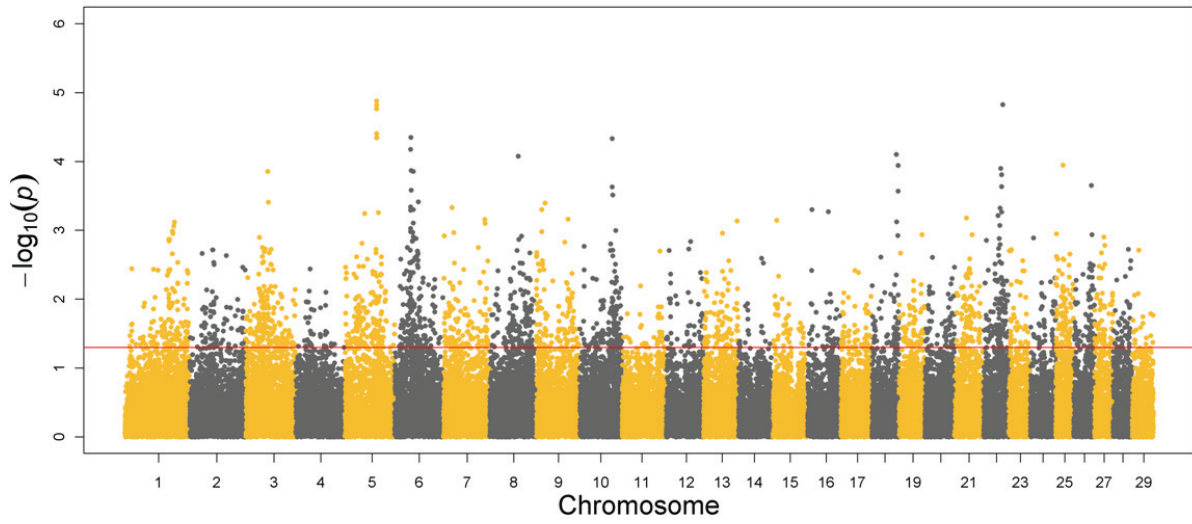

**(E) Lysine**

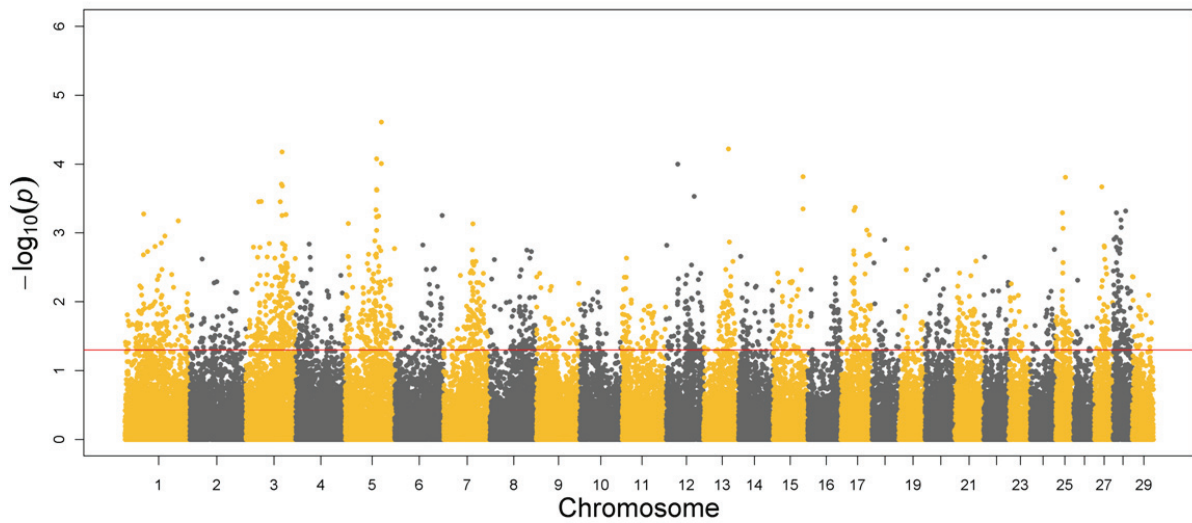

(F) C0

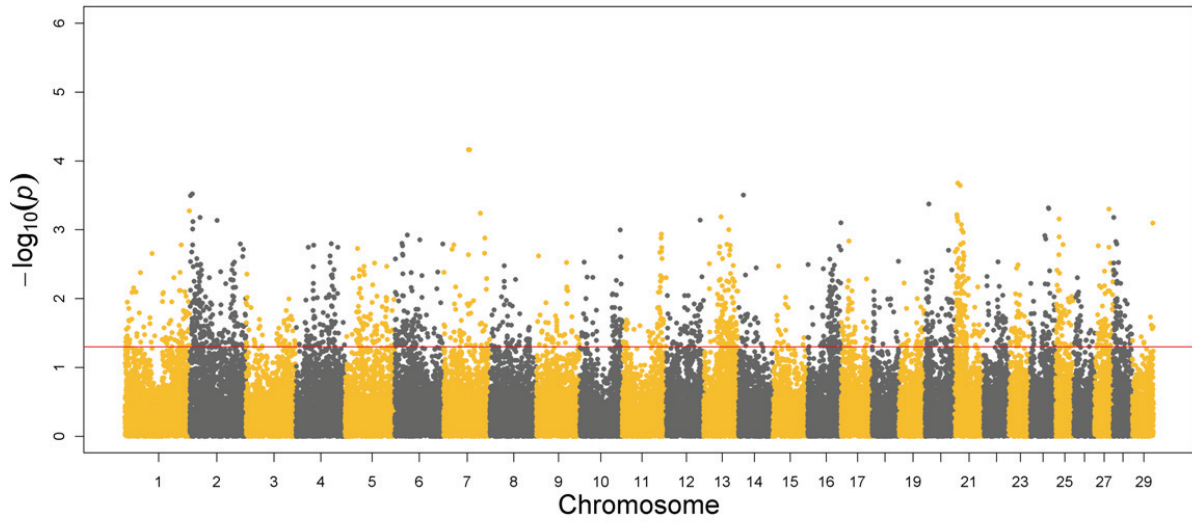

(G) C2

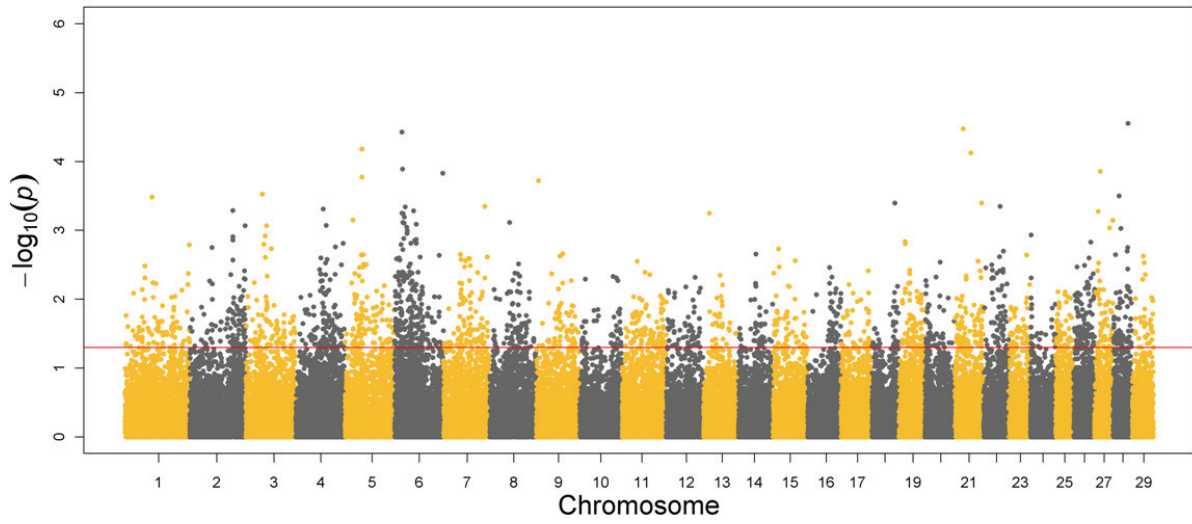

(H) C5

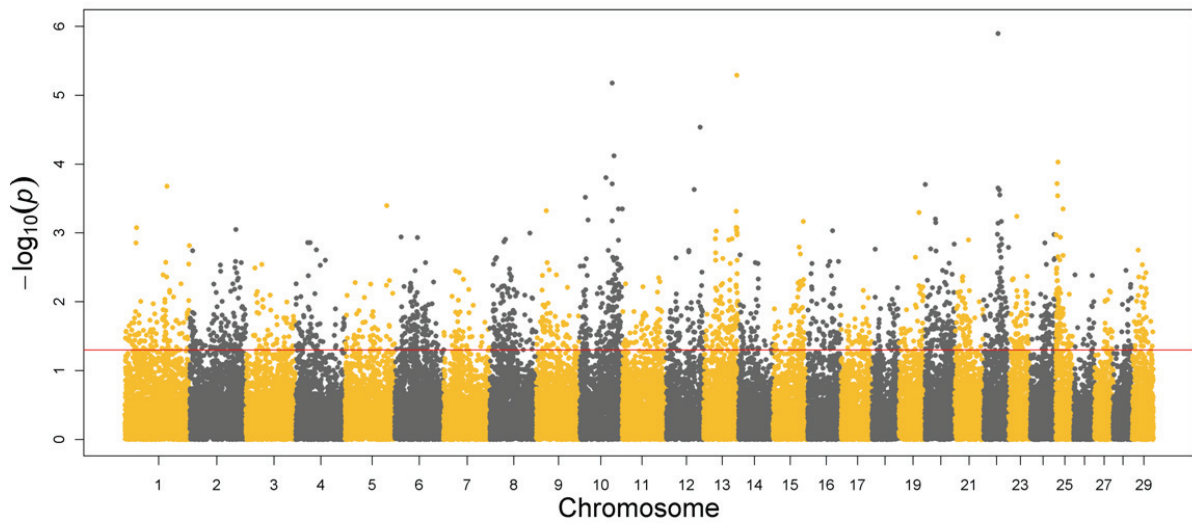

**(I) C8:1**

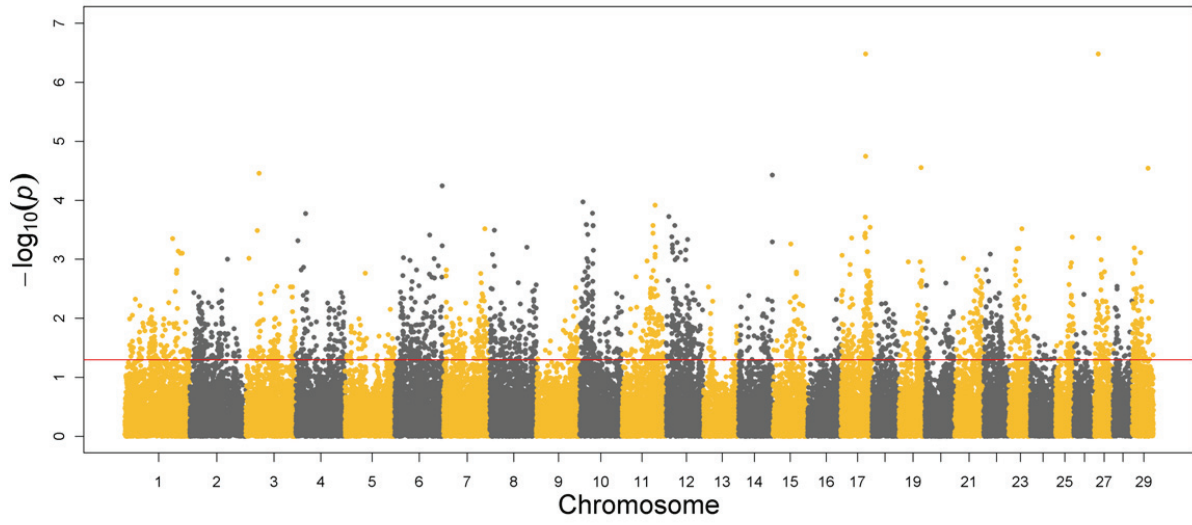

**(J) C14**

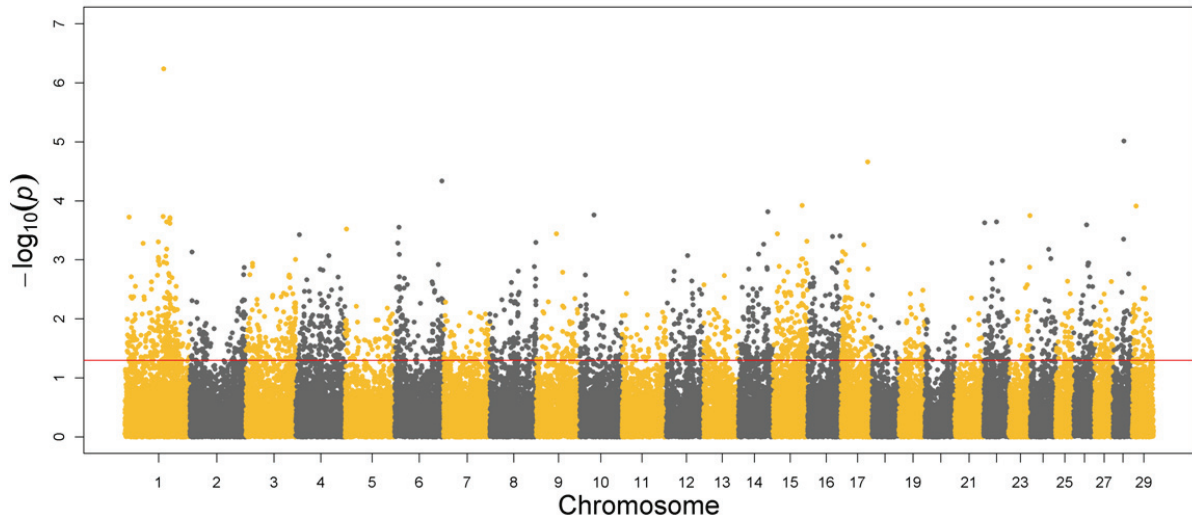

**(K) C18**

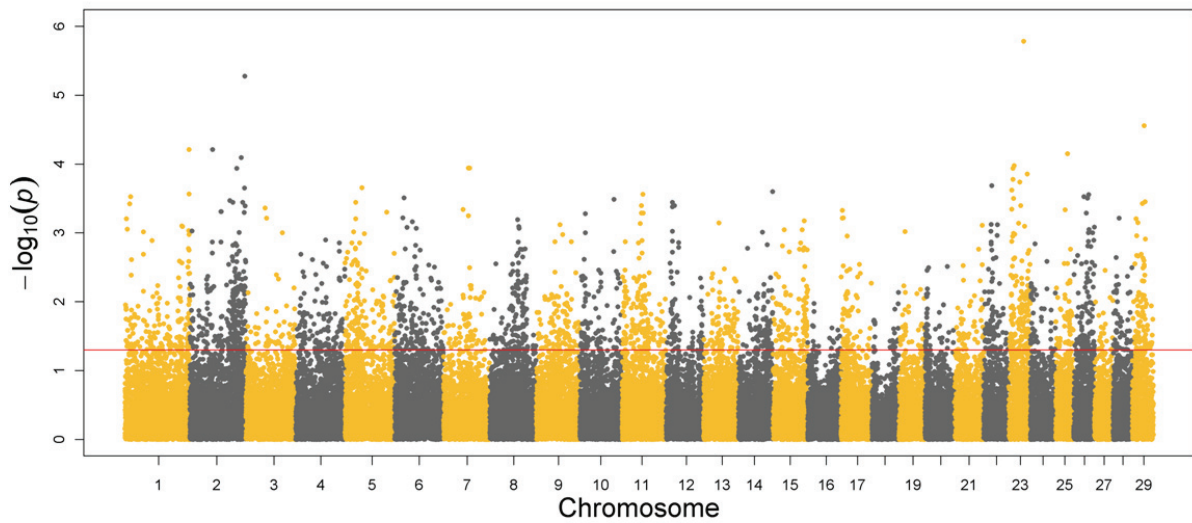

(L) PC\_aa\_C32:0

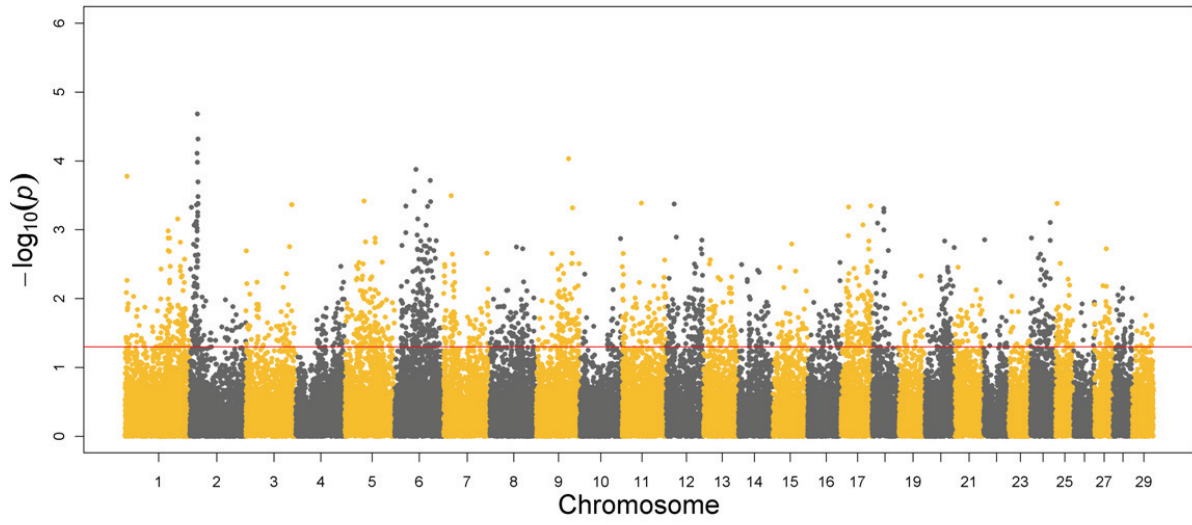

(M) PC\_ae\_C36:1

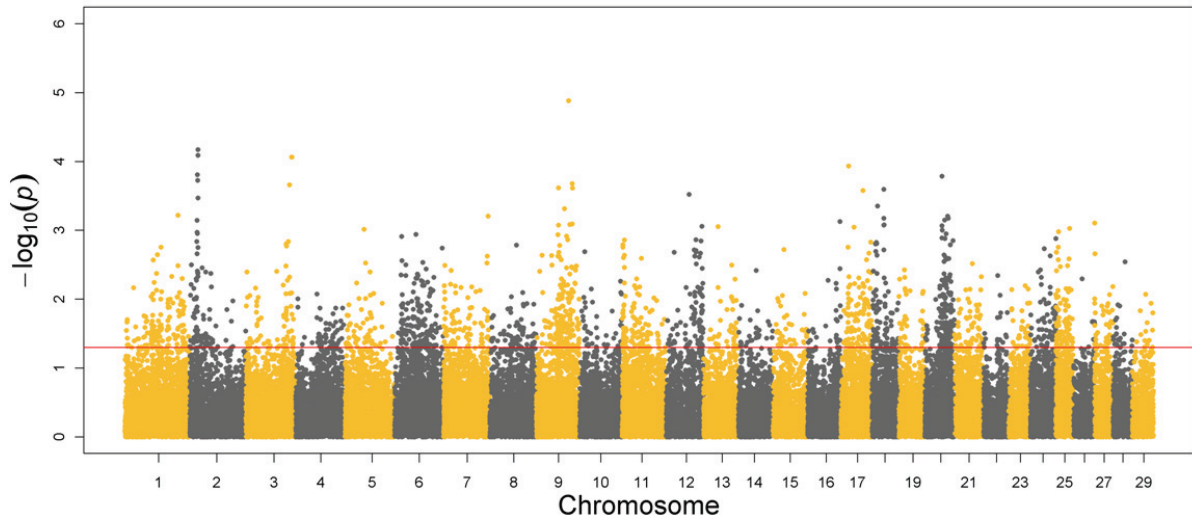

(N) SM\_C20:2

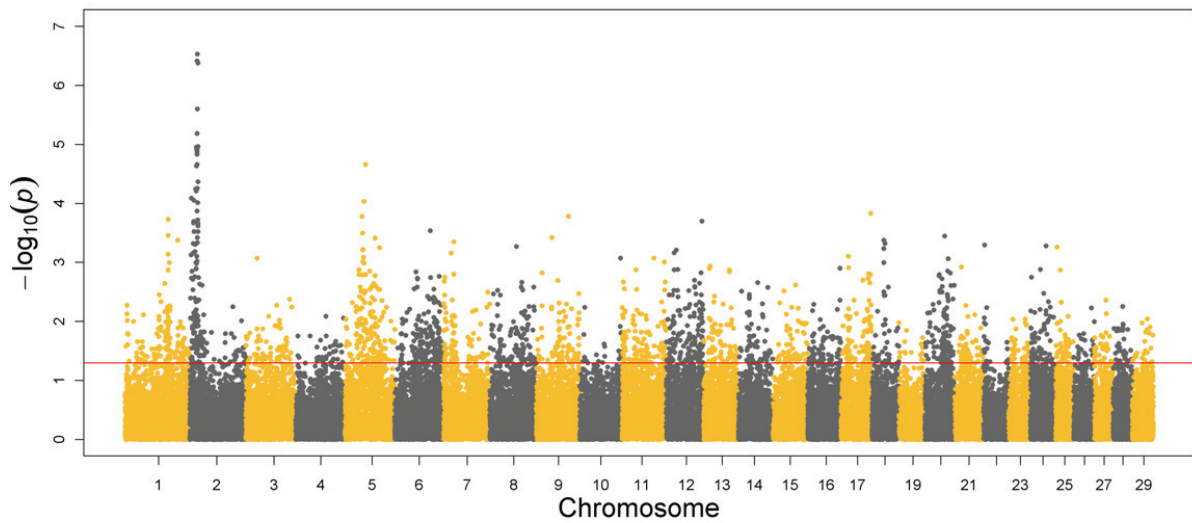

Supplement: pone.0124574.s001.pdf [file pone.0124574.s001.pdf]
